|                       | 20               | 40                | 60                 | 80                  |                                 |
|-----------------------|------------------|-------------------|--------------------|---------------------|---------------------------------|
| Homo sapiens          | MAHCGQLNWLCLAW   | ERKESPDFLSIFRLY   | LDLTPKLIKCSDKTIT   | TKTHCLLPLISSALSSIVL | IGWQWTKTARHYKAGKAIHQONPOS : 93  |
| Pan troglodytes       | MAHCGQLNWLCLAW   | ERKESPDFLSIFRLY   | LDLTPKLIKCSDKTIT   | TKTHCLLPLISSALSSIVL | IGWQWTKTARHYKAGKAIHQONPOS : 93  |
| Bos taurus            | MAHCGQLNWLCLAW   | ERKESPDFLSIFRLY   | LDLTPKLIKCSDKTIT   | TKTHCLLPLISSALSSIVL | IGWQWTKTARHYKAGKAIHQONPOS : 93  |
| Equus caballus        | MAHCGQLNWLCLAW   | ERKESPDFLSIFRLY   | LDLTPKLIKCSDKTIT   | TKTHCLLPLISSALSSIVL | IGWQWTKTARHYKAGKAIHQONPOS : 93  |
| Sus scrofa            | MAHCGQLNWLCLAW   | ERKESPDFLSIFRLY   | LDLTPKLIKCSDKTIT   | TKTHCLLPLISSALSSIVL | IGWQWTKTARHYKAGKAIHQONPOS : 93  |
| Canis familiaris      | MAHCGQLNWLCLAW   | ERKESPDFLSIFRLY   | LDLTPKLIKCSDKTIT   | TKTHCLLPLISSALSSIVL | IGWQWTKTARHYKAGKAIHQONPOS : 93  |
| Oryctolagus cuniculus | MAHCGQLNWLCLAW   | ERKESPDFLSIFRLY   | LDLTPKLIKCSDKTIT   | TKTHCLLPLISSALSSIVL | IGWQWTKTARHYKAGKAIHQONPOS : 93  |
| Gallus gallus         | MAHCGQLNWLCLAW   | ERKESPDFLSIFRLY   | LDLTPKLIKCSDKTIT   | TKTHCLLPLISSALSSIVL | IGWQWTKTARHYKAGKAIHQONPOS : 93  |
| Taeniopygia guttata   | MAHCGQLNWLCLAW   | ERKESPDFLSIFRLY   | LDLTPKLIKCSDKTIT   | TKTHCLLPLISSALSSIVL | IGWQWTKTARHYKAGKAIHQONPOS : 93  |
| Mus musculus          | MAHCGQLNWLCLAW   | ERKESPDFLSIFRLY   | LDLTPKLIKCSDKTIT   | TKTHCLLPLISSALSSIVL | IGWQWTKTARHYKAGKAIHQONPOS : 93  |
| Anolis carolinensis   | MAHCGQLNWLCLAW   | ERKESPDFLSIFRLY   | LDLTPKLIKCSDKTIT   | TKTHCLLPLISSALSSIVL | IGWQWTKTARHYKAGKAIHQONPOS : 93  |
| Xenopus               | MAHCGQLNWLCLAW   | ERKESPDFLSIFRLY   | LDLTPKLIKCSDKTIT   | TKTHCLLPLISSALSSIVL | IGWQWTKTARHYKAGKAIHQONPOS : 93  |
| Homo sapiens          | 100              | 120               | 140                | 160                 | 180                             |
| Homo sapiens          | RHRPRPAGALPQISRD | SQRCLLRLFRVLR     | PRGFSFSAEPAFAFGATA | MAASLSRLSLELLD      | WVLRRLRRLRLLPSPAAVAEQEESE : 181 |
| Pan troglodytes       | RHRPRPAGALPQISRD | SQRCLLRLFRVLR     | PRGFSFSAEPAFAFGATA | MAASLSRLSLELLD      | WVLRRLRRLRLLPSPAAVAEQEESE : 181 |
| Bos taurus            | RHRPRPAGALPQISRD | SQRCLLRLFRVLR     | PRGFSFSAEPAFAFGATA | MAASLSRLSLELLD      | WVLRRLRRLRLLPSPAAVAEQEESE : 181 |
| Equus caballus        | RHRPRPAGALPQISRD | SQRCLLRLFRVLR     | PRGFSFSAEPAFAFGATA | MAASLSRLSLELLD      | WVLRRLRRLRLLPSPAAVAEQEESE : 181 |
| Sus scrofa            | RHRPRPAGALPQISRD | SQRCLLRLFRVLR     | PRGFSFSAEPAFAFGATA | MAASLSRLSLELLD      | WVLRRLRRLRLLPSPAAVAEQEESE : 181 |
| Canis familiaris      | RHRPRPAGALPQISRD | SQRCLLRLFRVLR     | PRGFSFSAEPAFAFGATA | MAASLSRLSLELLD      | WVLRRLRRLRLLPSPAAVAEQEESE : 181 |
| Oryctolagus cuniculus | RHRPRPAGALPQISRD | SQRCLLRLFRVLR     | PRGFSFSAEPAFAFGATA | MAASLSRLSLELLD      | WVLRRLRRLRLLPSPAAVAEQEESE : 181 |
| Gallus gallus         | RHRPRPAGALPQISRD | SQRCLLRLFRVLR     | PRGFSFSAEPAFAFGATA | MAASLSRLSLELLD      | WVLRRLRRLRLLPSPAAVAEQEESE : 181 |
| Taeniopygia guttata   | RHRPRPAGALPQISRD | SQRCLLRLFRVLR     | PRGFSFSAEPAFAFGATA | MAASLSRLSLELLD      | WVLRRLRRLRLLPSPAAVAEQEESE : 181 |
| Mus musculus          | RHRPRPAGALPQISRD | SQRCLLRLFRVLR     | PRGFSFSAEPAFAFGATA | MAASLSRLSLELLD      | WVLRRLRRLRLLPSPAAVAEQEESE : 181 |
| Anolis carolinensis   | RHRPRPAGALPQISRD | SQRCLLRLFRVLR     | PRGFSFSAEPAFAFGATA | MAASLSRLSLELLD      | WVLRRLRRLRLLPSPAAVAEQEESE : 181 |
| Xenopus               | RHRPRPAGALPQISRD | SQRCLLRLFRVLR     | PRGFSFSAEPAFAFGATA | MAASLSRLSLELLD      | WVLRRLRRLRLLPSPAAVAEQEESE : 181 |
| Homo sapiens          | 200              | 220               | 240                | 260                 | 280                             |
| Homo sapiens          | EKEKGEASSPRG     | LCPAVALRRLDFFPTLV | VFDGEGAPAAEFPW     | GVLRRGKGLDLPQAT     | HRRLRLLPSPAAVAEQEESE : 266      |
| Pan troglodytes       | EKEKGEASSPRG     | LCPAVALRRLDFFPTLV | VFDGEGAPAAEFPW     | GVLRRGKGLDLPQAT     | HRRLRLLPSPAAVAEQEESE : 266      |
| Bos taurus            | EKEKGEASSPRG     | LCPAVALRRLDFFPTLV | VFDGEGAPAAEFPW     | GVLRRGKGLDLPQAT     | HRRLRLLPSPAAVAEQEESE : 266      |
| Equus caballus        | EKEKGEASSPRG     | LCPAVALRRLDFFPTLV | VFDGEGAPAAEFPW     | GVLRRGKGLDLPQAT     | HRRLRLLPSPAAVAEQEESE : 266      |
| Sus scrofa            | EKEKGEASSPRG     | LCPAVALRRLDFFPTLV | VFDGEGAPAAEFPW     | GVLRRGKGLDLPQAT     | HRRLRLLPSPAAVAEQEESE : 266      |
| Canis familiaris      | EKEKGEASSPRG     | LCPAVALRRLDFFPTLV | VFDGEGAPAAEFPW     | GVLRRGKGLDLPQAT     | HRRLRLLPSPAAVAEQEESE : 266      |
| Oryctolagus cuniculus | EKEKGEASSPRG     | LCPAVALRRLDFFPTLV | VFDGEGAPAAEFPW     | GVLRRGKGLDLPQAT     | HRRLRLLPSPAAVAEQEESE : 266      |
| Gallus gallus         | EKEKGEASSPRG     | LCPAVALRRLDFFPTLV | VFDGEGAPAAEFPW     | GVLRRGKGLDLPQAT     | HRRLRLLPSPAAVAEQEESE : 266      |
| Taeniopygia guttata   | EKEKGEASSPRG     | LCPAVALRRLDFFPTLV | VFDGEGAPAAEFPW     | GVLRRGKGLDLPQAT     | HRRLRLLPSPAAVAEQEESE : 266      |
| Mus musculus          | EKEKGEASSPRG     | LCPAVALRRLDFFPTLV | VFDGEGAPAAEFPW     | GVLRRGKGLDLPQAT     | HRRLRLLPSPAAVAEQEESE : 266      |
| Anolis carolinensis   | EKEKGEASSPRG     | LCPAVALRRLDFFPTLV | VFDGEGAPAAEFPW     | GVLRRGKGLDLPQAT     | HRRLRLLPSPAAVAEQEESE : 266      |
| Xenopus               | EKEKGEASSPRG     | LCPAVALRRLDFFPTLV | VFDGEGAPAAEFPW     | GVLRRGKGLDLPQAT     | HRRLRLLPSPAAVAEQEESE : 266      |
| Homo sapiens          | 300              | 320               | 340                | 360                 | 380                             |
| Homo sapiens          | PTPTLGLGAD       | ATAAHRVVGPA       | ASGCRHRRGRRL       | RVVERTGDA           | AVLVDL                          |
| Pan troglodytes       | PTPTLGLGAD       | ATAAHRVVGPA       | ASGCRHRRGRRL       | RVVERTGDA           | AVLVDL                          |
| Bos taurus            | PTPTLGLGAD       | ATAAHRVVGPA       | ASGCRHRRGRRL       | RVVERTGDA           | AVLVDL                          |
| Equus caballus        | PTPTLGLGAD       | ATAAHRVVGPA       | ASGCRHRRGRRL       | RVVERTGDA           | AVLVDL                          |
| Sus scrofa            | PTPTLGLGAD       | ATAAHRVVGPA       | ASGCRHRRGRRL       | RVVERTGDA           | AVLVDL                          |
| Canis familiaris      | PTPTLGLGAD       | ATAAHRVVGPA       | ASGCRHRRGRRL       | RVVERTGDA           | AVLVDL                          |
| Oryctolagus cuniculus | PTPTLGLGAD       | ATAAHRVVGPA       | ASGCRHRRGRRL       | RVVERTGDA           | AVLVDL                          |
| Gallus gallus         | PTPTLGLGAD       | ATAAHRVVGPA       | ASGCRHRRGRRL       | RVVERTGDA           | AVLVDL                          |
| Taeniopygia guttata   | PTPTLGLGAD       | ATAAHRVVGPA       | ASGCRHRRGRRL       | RVVERTGDA           | AVLVDL                          |
| Mus musculus          | PTPTLGLGAD       | ATAAHRVVGPA       | ASGCRHRRGRRL       | RVVERTGDA           | AVLVDL                          |
| Anolis carolinensis   | PTPTLGLGAD       | ATAAHRVVGPA       | ASGCRHRRGRRL       | RVVERTGDA           | AVLVDL                          |
| Xenopus               | PTPTLGLGAD       | ATAAHRVVGPA       | ASGCRHRRGRRL       | RVVERTGDA           | AVLVDL                          |
| Homo sapiens          | 400              | 420               | 440                | 460                 | 480                             |
| Homo sapiens          | GAEVSPQTOQE      | ROOLOPAS          | PSPEADKPLG         | ELIPEAKDLKEMV       | KSKAECNMGVSV                    |
| Pan troglodytes       | GAEVSPQTOQE      | ROOLOPAS          | PSPEADKPLG         | ELIPEAKDLKEMV       | KSKAECNMGVSV                    |
| Bos taurus            | GAEVSPQTOQE      | ROOLOPAS          | PSPEADKPLG         | ELIPEAKDLKEMV       | KSKAECNMGVSV                    |
| Equus caballus        | GAEVSPQTOQE      | ROOLOPAS          | PSPEADKPLG         | ELIPEAKDLKEMV       | KSKAECNMGVSV                    |
| Sus scrofa            | GAEVSPQTOQE      | ROOLOPAS          | PSPEADKPLG         | ELIPEAKDLKEMV       | KSKAECNMGVSV                    |
| Canis familiaris      | GAEVSPQTOQE      | ROOLOPAS          | PSPEADKPLG         | ELIPEAKDLKEMV       | KSKAECNMGVSV                    |
| Oryctolagus cuniculus | GAEVSPQTOQE      | ROOLOPAS          | PSPEADKPLG         | ELIPEAKDLKEMV       | KSKAECNMGVSV                    |
| Gallus gallus         | GAEVSPQTOQE      | ROOLOPAS          | PSPEADKPLG         | ELIPEAKDLKEMV       | KSKAECNMGVSV                    |
| Taeniopygia guttata   | GAEVSPQTOQE      | ROOLOPAS          | PSPEADKPLG         | ELIPEAKDLKEMV       | KSKAECNMGVSV                    |
| Mus musculus          | GAEVSPQTOQE      | ROOLOPAS          | PSPEADKPLG         | ELIPEAKDLKEMV       | KSKAECNMGVSV                    |
| Anolis carolinensis   | GAEVSPQTOQE      | ROOLOPAS          | PSPEADKPLG         | ELIPEAKDLKEMV       | KSKAECNMGVSV                    |
| Xenopus               | GAEVSPQTOQE      | ROOLOPAS          | PSPEADKPLG         | ELIPEAKDLKEMV       | KSKAECNMGVSV                    |
| Homo sapiens          | 500              | 520               | 540                | 560                 | 580                             |
| Homo sapiens          | VTELDME          | NTCPPLV           | NLTOEKPPAAQ        | ITIE                | PORNPVEEMDD                     |
| Pan troglodytes       | VTELDME          | NTCPPLV           | NLTOEKPPAAQ        | ITIE                | PORNPVEEMDD                     |
| Bos taurus            | VTELDME          | NTCPPLV           | NLTOEKPPAAQ        | ITIE                | PORNPVEEMDD                     |
| Equus caballus        | VTELDME          | NTCPPLV           | NLTOEKPPAAQ        | ITIE                | PORNPVEEMDD                     |
| Sus scrofa            | VTELDME          | NTCPPLV           | NLTOEKPPAAQ        | ITIE                | PORNPVEEMDD                     |
| Canis familiaris      | VTELDME          | NTCPPLV           | NLTOEKPPAAQ        | ITIE                | PORNPVEEMDD                     |
| Oryctolagus cuniculus | VTELDME          | NTCPPLV           | NLTOEKPPAAQ        | ITIE                | PORNPVEEMDD                     |
| Gallus gallus         | VTELDME          | NTCPPLV           | NLTOEKPPAAQ        | ITIE                | PORNPVEEMDD                     |
| Taeniopygia guttata   | VTELDME          | NTCPPLV           | NLTOEKPPAAQ        | ITIE                | PORNPVEEMDD                     |
| Mus musculus          | VTELDME          | NTCPPLV           | NLTOEKPPAAQ        | ITIE                | PORNPVEEMDD                     |
| Anolis carolinensis   | VTELDME          | NTCPPLV           | NLTOEKPPAAQ        | ITIE                | PORNPVEEMDD                     |
| Xenopus               | VTELDME          | NTCPPLV           | NLTOEKPPAAQ        | ITIE                | PORNPVEEMDD                     |
| Homo sapiens          | 600              | 620               | 640                | 660                 | 680                             |
| Homo sapiens          | TC               | QTE               | NRINT              | ROL                 | NALVE                           |
| Pan troglodytes       | TC               | QTE               | NRINT              | ROL                 | NALVE                           |
| Bos taurus            | TC               | QTE               | NRINT              | ROL                 | NALVE                           |
| Equus caballus        | TC               | QTE               | NRINT              | ROL                 | NALVE                           |
| Sus scrofa            | TC               | QTE               | NRINT              | ROL                 | NALVE                           |
| Canis familiaris      | TC               | QTE               | NRINT              | ROL                 | NALVE                           |
| Oryctolagus cuniculus | TC               | QTE               | NRINT              | ROL                 | NALVE                           |
| Gallus gallus         | TC               | QTE               | NRINT              | ROL                 | NALVE                           |
| Taeniopygia guttata   | TC               | QTE               | NRINT              | ROL                 | NALVE                           |
| Mus musculus          | TC               | QTE               | NRINT              | ROL                 | NALVE                           |
| Anolis carolinensis   | TC               | QTE               | NRINT              | ROL                 | NALVE                           |
| Xenopus               | TC               | QTE               | NRINT              | ROL                 | NALVE                           |
| Homo sapiens          | 700              | 720               | 740                | 760                 | 780                             |
| Homo sapiens          | QIENYKEDKYS      | SSGALIKRVR        | RLG                | GL                  | NTLRL                           |
| Pan troglodytes       | QIENYKEDKYS      | SSGALIKRVR        | RLG                | GL                  | NTLRL                           |
| Bos taurus            | QIENYKEDKYS      | SSGALIKRVR        | RLG                | GL                  | NTLRL                           |
| Equus caballus        | QIENYKEDKYS      | SSGALIKRVR        | RLG                | GL                  | NTLRL                           |
| Sus scrofa            | QIENYKEDKYS      | SSGALIKRVR        | RLG                | GL                  | NTLRL                           |
| Canis familiaris      | QIENYKEDKYS      | SSGALIKRVR        | RLG                | GL                  | NTLRL                           |
| Oryctolagus cuniculus | QIENYKEDKYS      | SSGALIKRVR        | RLG                | GL                  | NTLRL                           |
| Gallus gallus         | QIENYKEDKYS      | SSGALIKRVR        | RLG                | GL                  | NTLRL                           |
| Taeniopygia guttata   | QIENYKEDKYS      | SSGALIKRVR        | RLG                | GL                  | NTLRL                           |
| Mus musculus          | QIENYKEDKYS      | SSGALIKRVR        | RLG                | GL                  | NTLRL                           |
| Anolis carolinensis   | QIENYKEDKYS      | SSGALIKRVR        | RLG                | GL                  | NTLRL                           |
| Xenopus               | QIENYKEDKYS      | SSGALIKRVR        | RLG                | GL                  | NTLRL                           |
| Homo sapiens          | 800              | 820               | 840                | 860                 | 880                             |
| Homo sapiens          | VKLSSAEO         | SOKPOLPE          | DKYLDSDASFT        | TENDI               | ROIS                            |
| Pan troglodytes       | VKLSSAEO         | SOKPOLPE          | DKYLDSDASFT        | TENDI               | ROIS                            |
| Bos taurus            | VKLSSAEO         | SOKPOLPE          | DKYLDSDASFT        | TENDI               | ROIS                            |
| Equus caballus        | VKLSSAEO         | SOKPOLPE          | DKYLDSDASFT        | TENDI               | ROIS                            |
| Sus scrofa            | VKLSSAEO         | SOKPOLPE          | DKYLDSDASFT        | TENDI               | ROIS                            |
| Canis familiaris      | VKLSSAEO         | SOKPOLPE          | DKYLDSDASFT        | TENDI               | ROIS                            |
| Oryctolagus cuniculus | VKLSSAEO         | SOKPOLPE          | DKYLDSDASFT        | TENDI               | ROIS                            |
| Gallus gallus         | VKLSSAEO         | SOKPOLPE          | DKYLDSDASFT        | TENDI               | ROIS                            |
| Taeniopygia guttata   | VKLSSAEO         | SOKPOLPE          | DKYLDSDASFT        | TENDI               | ROIS                            |
| Mus musculus          | VKLSSAEO         | SOKPOLPE          | DKYLDSDASFT        | TENDI               | ROIS                            |
| Anolis carolinensis   | VKLSSAEO         | SOKPOLPE          | DKYLDSDASFT        | TENDI               | ROIS                            |
| Xenopus               | VKLSSAEO         | SOKPOLPE          | DKYLDSDASFT        | TENDI               | ROIS                            |
| Homo sapiens          | 900              | 920               | 940                | 960                 | 980                             |
| Homo sapiens          | RTP              | INILGNVEMK        | IQSECVFOQ          | DAVVR               | IVDK                            |
| Pan troglodytes       | RTP              | INILGNVEMK        | IQSECVFOQ          | DAVVR               | IVDK                            |
| Bos taurus            | RTP              | INILGNVEMK        | IQSECVFOQ          | DAVVR               | IVDK                            |
| Equus caballus        | RTP              | INILGNVEMK        | IQSECVFOQ          | DAVVR               | IVDK                            |
| Sus scrofa            | RTP              | INILGNVEMK        | IQSECVFOQ          | DAVVR               | IVDK                            |
| Canis familiaris      | RTP              | INILGNVEMK        | IQSECVFOQ          | DAVVR               | IVDK                            |
| Oryctolagus cuniculus | RTP              | INILGNVEMK        | IQSECVFOQ          | DAVVR               | IVDK                            |
| Gallus gallus         | RTP              | INILGNVEMK        | IQSECVFOQ          | DAVVR               | IVDK                            |
| Taeniopygia guttata   | RTP              | INILGNVEMK        | IQSECVFOQ          | DAVVR               | IVDK                            |
| Mus musculus          | RTP              | INILGNVEMK        | IQSECVFOQ          | DAVVR               | IVDK                            |
| Anolis carolinensis   | RTP              | INILGNVEMK        | IQSECVFOQ          | DAVVR               | IVDK                            |
| Xenopus               | RTP              | INILGNVEMK        | IQSECVFOQ          | DAVVR               | IVDK                            |
| Homo sapiens          | 1000             | 1020              | 1040               | 1060                | 1080                            |
| Homo sapiens          | FCSEED           | SRKSKAHDS         | RTENPKHSOYTS       | SDG                 | CV                              |
| Pan troglodytes       | FCSEED           | SRKSKAHDS         | RTENPKHSOYTS       | SDG                 | CV                              |
| Bos taurus            | FCSEED           | SRKSKAHDS         | RTENPKHSOYTS       | SDG                 | CV                              |
| Equus caballus        | FCSEED           | SRKSKAHDS         | RTENPKHSOYTS       | SDG                 | CV                              |
| Sus scrofa            | FCSEED           | SRKSKAHDS         | RTENPKHSOYTS       | SDG                 | CV                              |
| Canis familiaris      | FCSEED           | SRKSKAHDS         | RTENPKHSOYTS       | SDG                 | CV                              |
| Oryctolagus cuniculus | FCSEED           | SRKSKAHDS         | RTENPKHSOYTS       | SDG                 | CV                              |
| Gallus gallus         | FCSEED           | SRKSKAHDS         | RTENPKHSOYTS       | SDG                 | CV                              |
| Taeniopygia guttata   | FCSEED           | SRKSKAHDS         | RTENPKHSOYTS       | SDG                 | CV                              |
| Mus musculus          | FCSEED           | SRKSKAHDS         | RTENPKHSOYTS       | SDG                 | CV                              |
| Anolis carolinensis   | FCSEED           | SRKSKAHDS         | RTENPKHSOYTS       | SDG                 | CV                              |
| Xenopus               | FCSEED           | SRKSKAHDS         | RTENPKHSOYTS       | SDG                 | CV                              |
| Homo sapiens          | 1100             | 1120              | 1140               | 1160                | 1180                            |
| Homo sapiens          | SHWTE            | KNOIDBMS          | MHN                | SKTA                | RQ                              |
| Pan troglodytes       | SHWTE            | KNOIDBMS          | MHN                | SKTA                | RQ                              |
| Bos taurus            | SHWTE            | KNOIDBMS          | MHN                | SKTA                | RQ                              |
| Equus caballus        | SHWTE            | KNOIDBMS          | MHN                | SKTA                | RQ                              |
| Sus scrofa            | SHWTE            | KNOIDBMS          | MHN                | SKTA                | RQ                              |
| Canis familiaris      | SHWTE            | KNOIDBMS          | MHN                | SKTA                | RQ                              |
| Oryctolagus cuniculus | SHWTE            | KNOIDBMS          | MHN                | SKTA                | RQ                              |
| Gallus gallus         | SHWTE            | KNOIDBMS          | MHN                | SKTA                | RQ                              |
| Taeniopygia guttata   | SHWTE            | KNOIDBMS          | MHN                | SKTA                | RQ                              |
| Mus musculus          | SHWTE            | KNOIDBMS          | MHN                | SKTA                | RQ                              |
| Anolis carolinensis   | SHWTE            | KNOIDBMS          | MHN                | SKTA                | RQ                              |
| Xenopus               | SHWTE            | KNOIDBMS          | MHN                | SKTA                | RQ                              |

Fig. S1. Comparison of MTR120 amino acid sequences from various species.

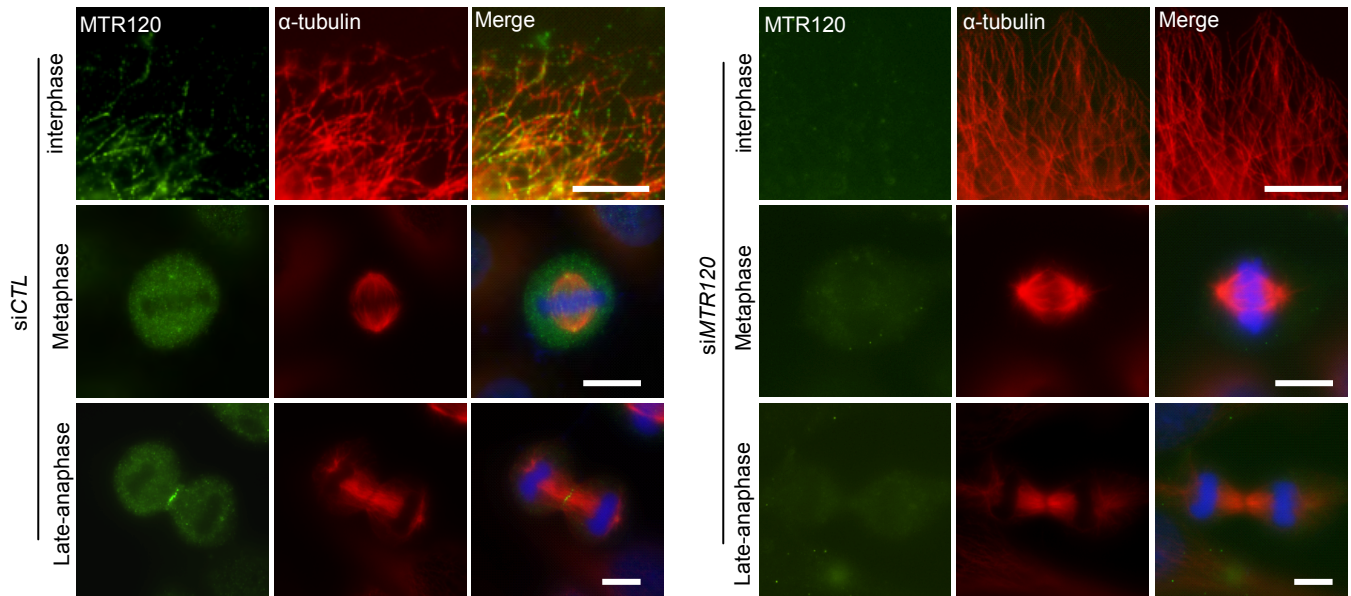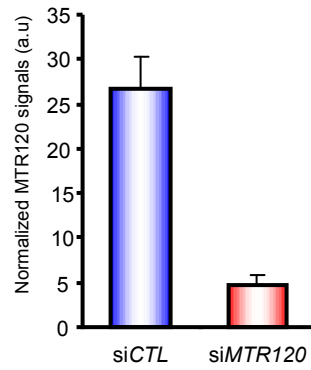

**Fig. S2.** HeLa cells were transfected with *siCTL* or *siMTR120* and immunostained for MTR120 and  $\alpha$ -tubulin at different cell cycle stages. Bar graph showed the fluorescence intensities ( $\pm$ SD) of MTR120 were normalized to  $\gamma$ -tubulin signals. 50 cells were surveyed in 3 independent experiments. Error bars represent  $\pm$ SD.

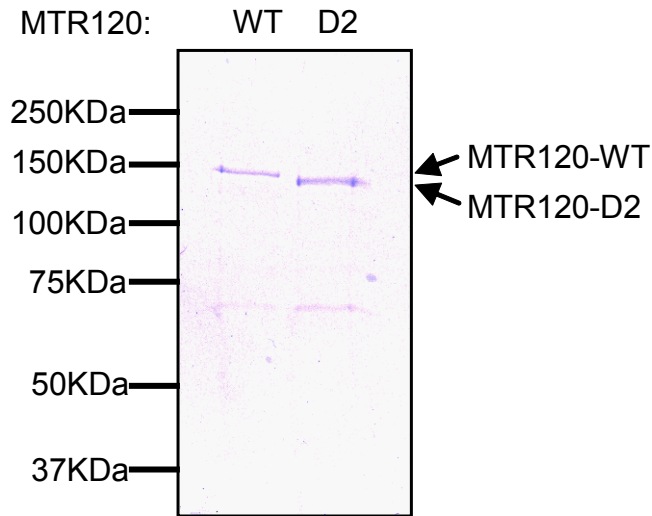

**Fig. S3.** SFB-tagged fusion proteins were purified from HEK293T cells, separated by SDS-PAGE, and stained by Coomassie blue

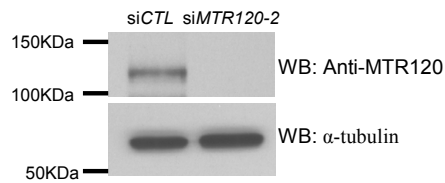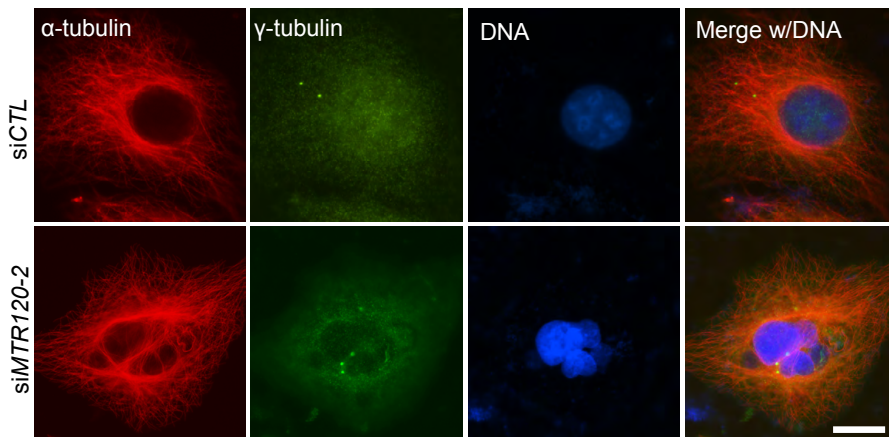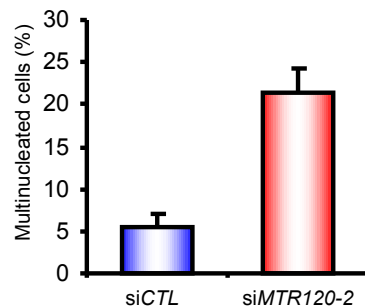

**Fig. S4.** Cells transfected with control siRNA (siCTL) or a second siRNA targeting *MTR120* (siMTR120-2) were subjected to Western blotting for MTR120 and  $\alpha$ -tubulin (upper panel). Immunofluorescence images of cells transfected with siCTL or siMTR120-2. Anti- $\gamma$ -tubulin and anti- $\alpha$ -tubulin antibodies were used to detect centrosomes and MTs (lower panel). DAPI was used to stain DNA. Bar graph showed the average percentages ( $\pm$ SD) of multinucleated cells subjected to siRNA treatment. 100 cells from each group were counted from three independent experiments. Error bars represent  $\pm$ SD. Bars, 10  $\mu$ m.

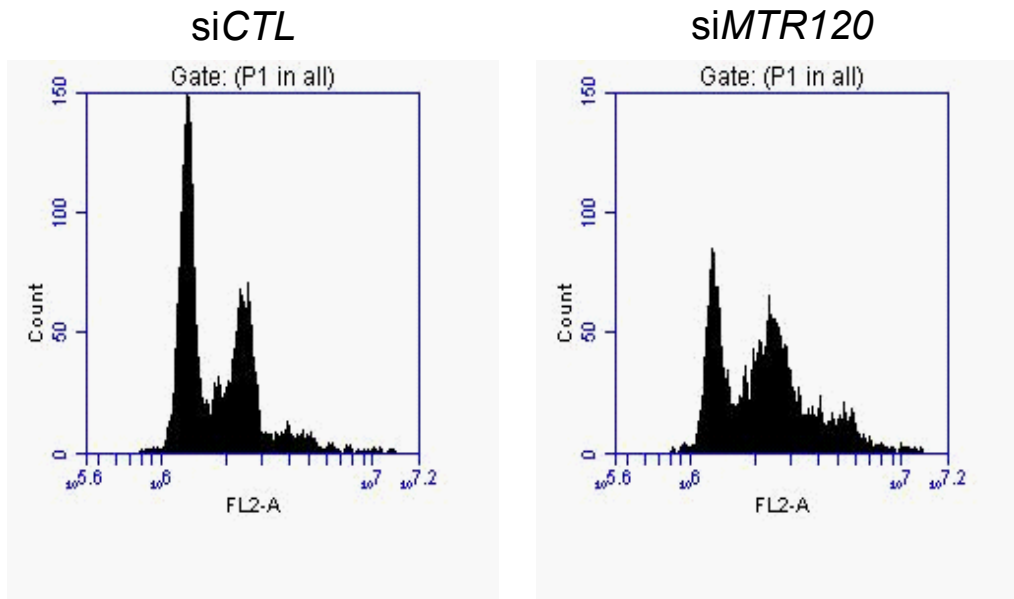

**Fig. S5.** Primary FACS data showed cell cycle distribution of HeLa cells after siRNA treatment.

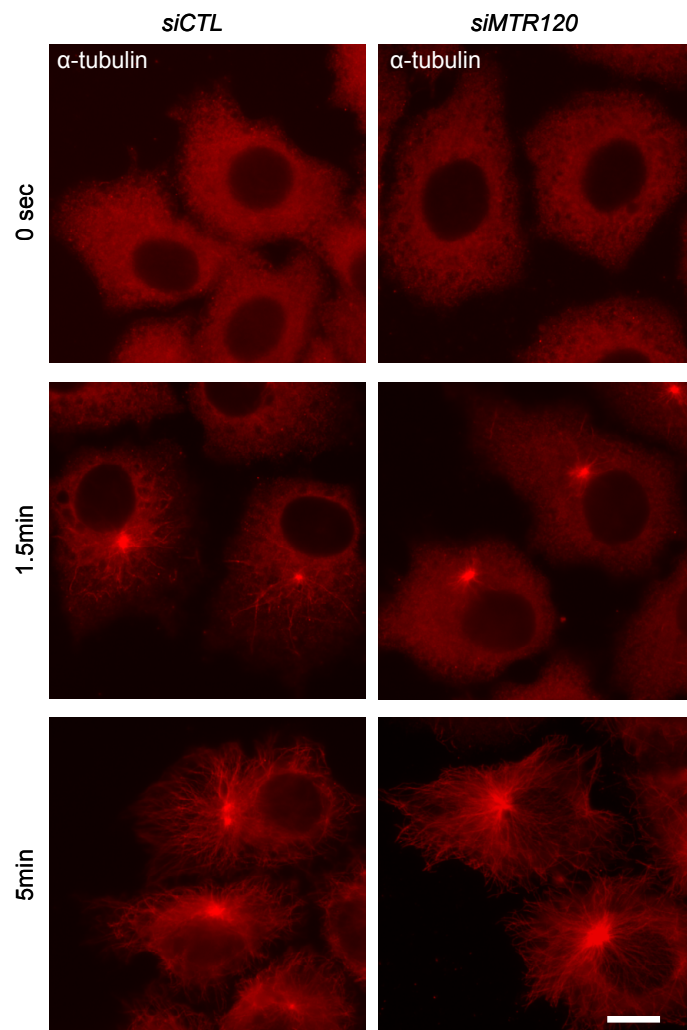

**Fig. S6.** Cells treated with control and *siMTR120* were placed onto ice water to depolymerize MTs for 1 h, and then the cold medium was replaced with medium prewarmed to 37°C in order to allow the MTs regrow from centrosomes. Cells were then fixed at different timepoints as indicated, followed by immunostaining with anti- $\alpha$ -tubulin antibody. Bars, 10  $\mu$ m.

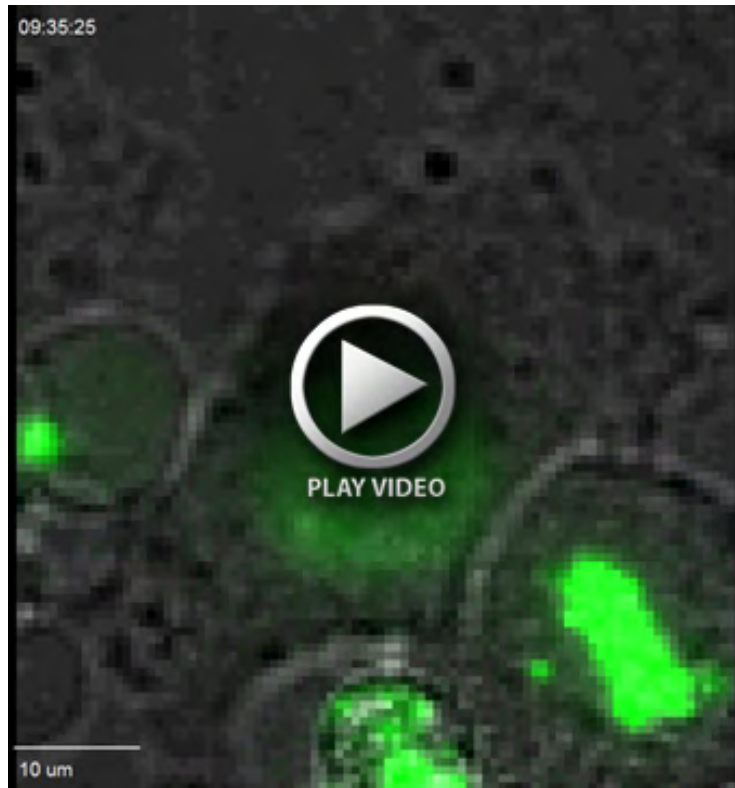

**Movie 1.** HeLa cells stably expressing GFP-H2B were treated with control siRNA. 72 hours after transfection, cells were video-imaged for brightfield and GFP at 15 minutes interval for 20 hours. The playback rate of the time-series movie is 4 frames per second.

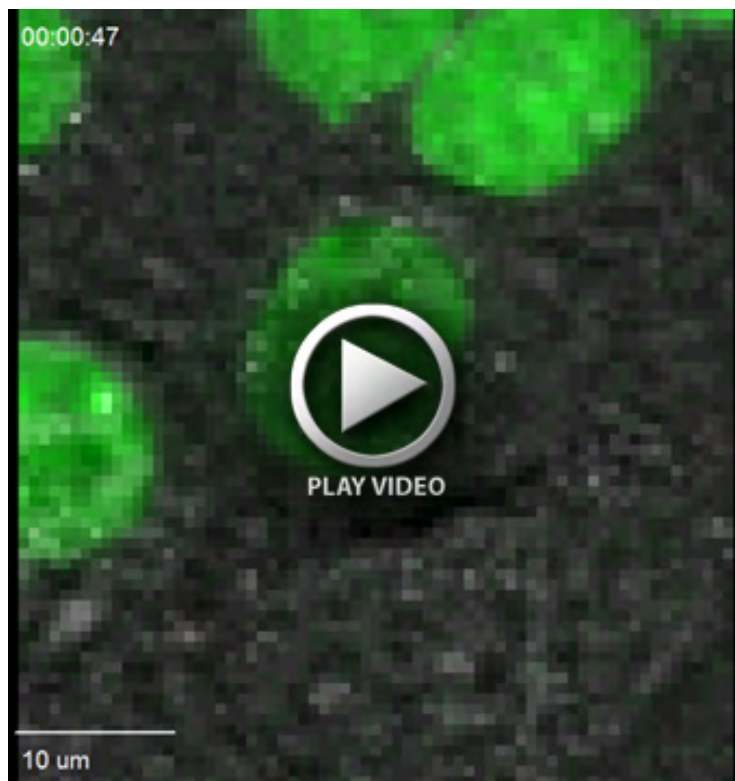

**Movie 2.** HeLa cells stably expressing GFP-H2B were treated with *MTR120* siRNA. 72 hours after transfection, cells were video-imaged for brightfield and GFP at 15 minutes interval for 20 hours. The playback rate of the time-series movie is 4 frames per second.
